# Supplementary material for: Highly conserved shifts in ubiquitin-proteasome system (UPS) activity drive mitochondrial remodeling during quiescence
Source: PubMed Central journal article supplement (PMC9343427; doi:10.1038/s41467-022-32206-2), 2022-08-01
Supplement: 41467_2022_32206_MOESM1_ESM.pdf [file 41467_2022_32206_MOESM1_ESM.pdf]

# Supplementary Figure 1

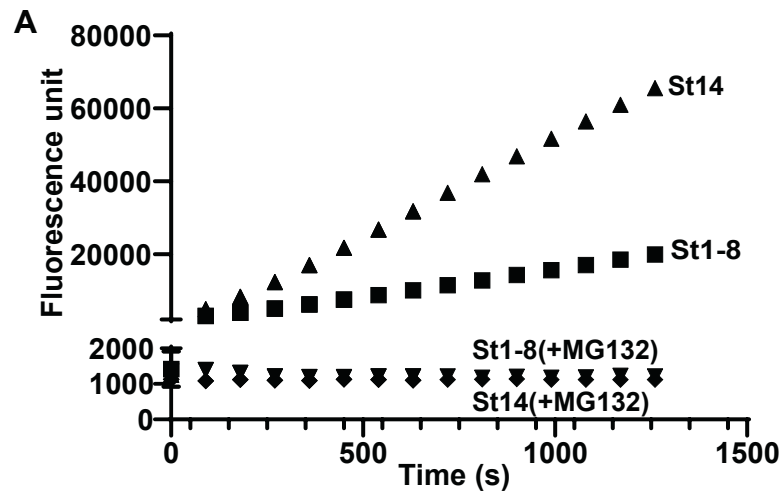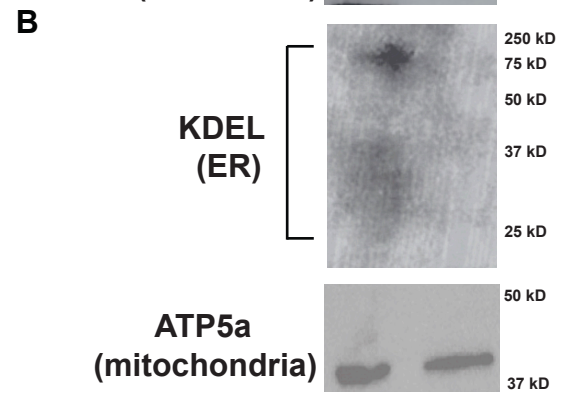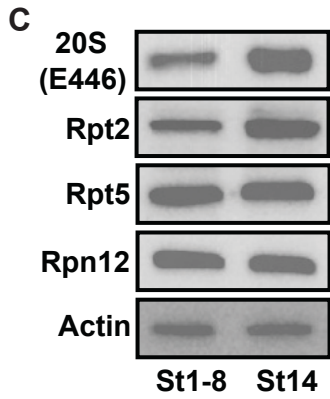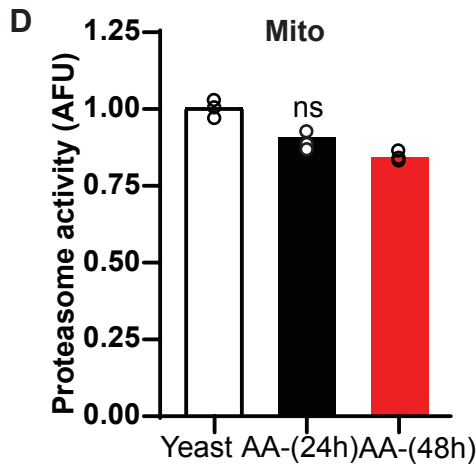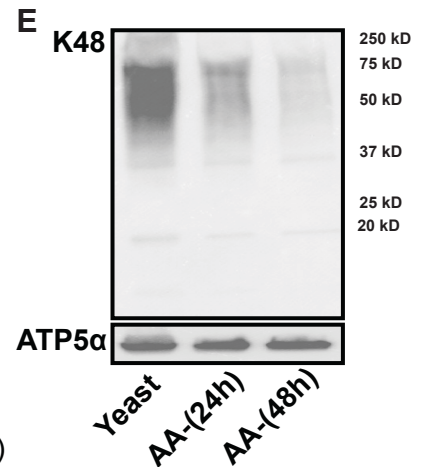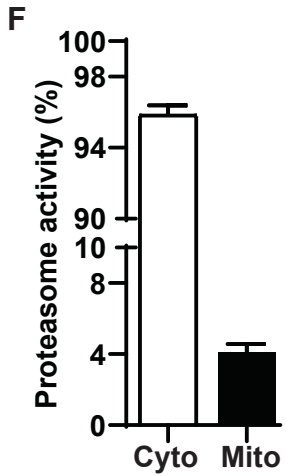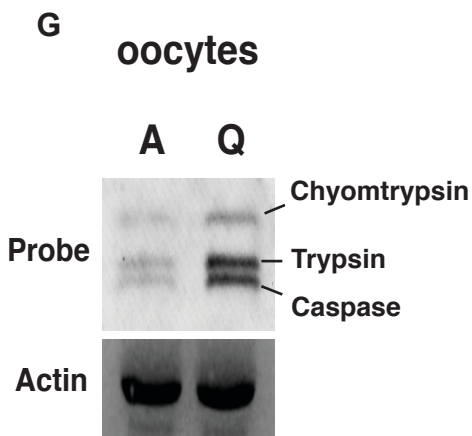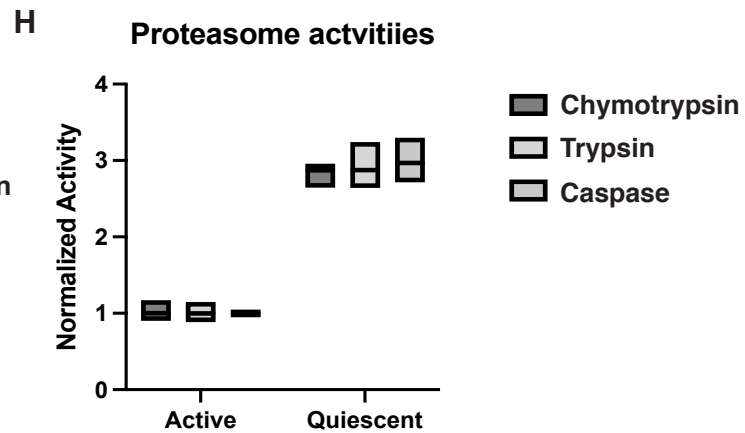

## Supplementary Figure 1

A: Representative proteasome activity curve and control (+MG132) for total cell lysis in st1-8 and st14 eggs.

B: Western blots examining plasma membrane and ER levels in mitochondrial fractions. DLL1 and ATP5A blots show a signal bands where as KDEL show multiple bands consistent with detecting the ER localization signal of multiple proteins(n=3 independent experiments).

C: Denaturing Western blots to examine 20S core and 19S regulatory components of the proteasome in total cell lysis from st1-8 and st14 eggs(n=3 independent experiments).

D and E: Mitochondria-associated proteasome activity and K48 ubiquitin levels in st14 eggs from animals fed either a yeast or amino acid-deficient diet (AA-) for indicated times. n=3 completely independent experiments on independent samples. Significance values are calculated by a two -tailed student's t-test assuming unequal variance. Error bars represent one standard deviation.

F: Percentage of proteasome activity in cytosolic (-mitochondria) and mitochondrial fractions from mixed egg samples. n=3 completely independent experiments on independent samples

G: Assays using UbiQ-018 activity probe which detects all three active sites of the proteasome measuring proteasome activity in active and quiescent oocytes.

H: Quantification of the three activities of the proteasome (trypsin, chymotrypsin, and caspase) for active and quiescent oocytes (n=6 completely independent experiments on independent samples).

## Supplementary Figure 2

**A**

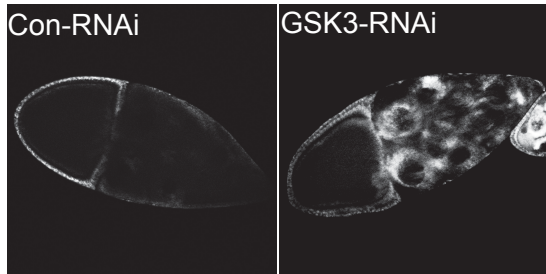

**B**

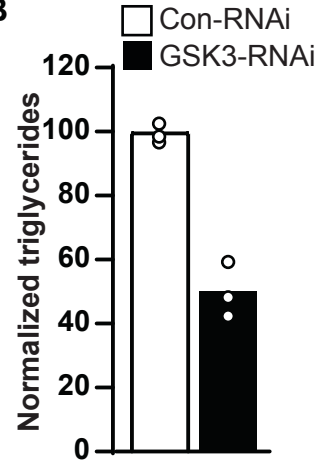

**C**

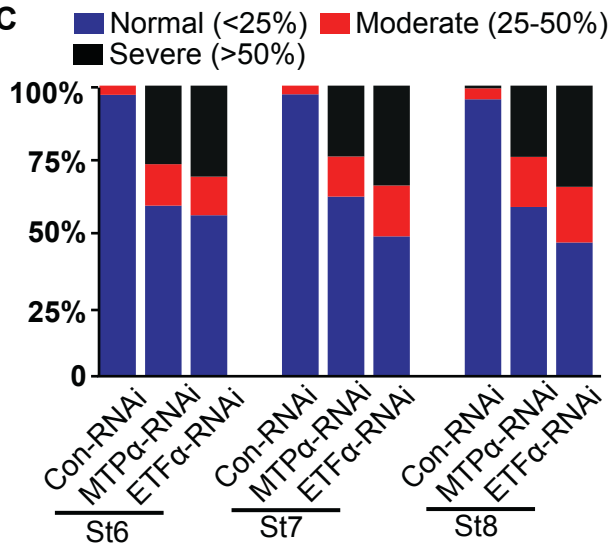

**D**

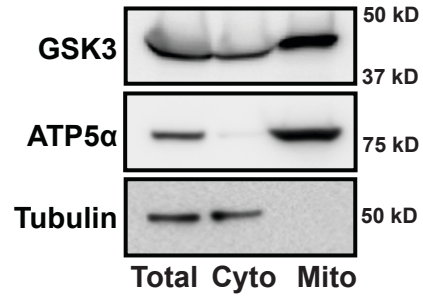

**E**

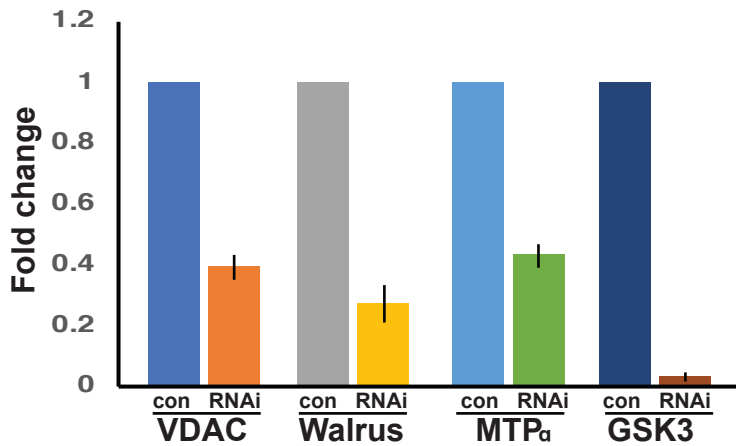

**F**

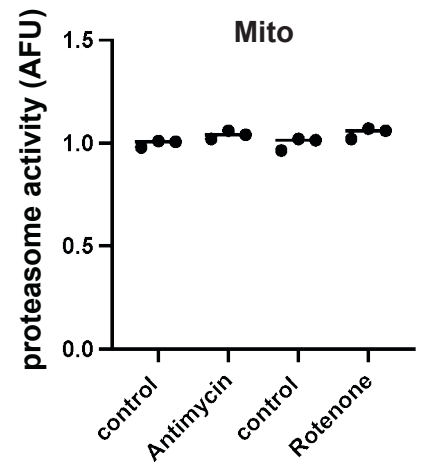

## Supplementary Figure 2

A: TMRE staining of a control-RNAi and GSK3-RNAi ovarioles.

B: Normalized triglyceride levels in st14 eggs from a control-RNAi and GSK3-RNAi ovarioles (n=8 independent samples).

C: Quantification of TMRE staining from staged MTP $\alpha$ -RNAi and ETF $\alpha$ -RNAi egg chambers(n>40 ovarioles).

D: Western blotting to detect GSK3 protein levels in total, cytosolic and mitochondrial fractions from wild-type ovarioles(n=3 independent experiments).

E: Summary of effects of RNAi knockdown of either MTP $\alpha$  or ETF $\alpha$  on mRNA levels (n=3 independent experiments).

F: Mitochondrial associate proteasome activity from cells treated with either 0.3uM Rotenone or 0.3uM Antimycin A for 6 hrs(n=3 independent experiments). Significance values are calculated by a two -tailed student's t-test assuming unequal variance.



### Supplementary Figure 3

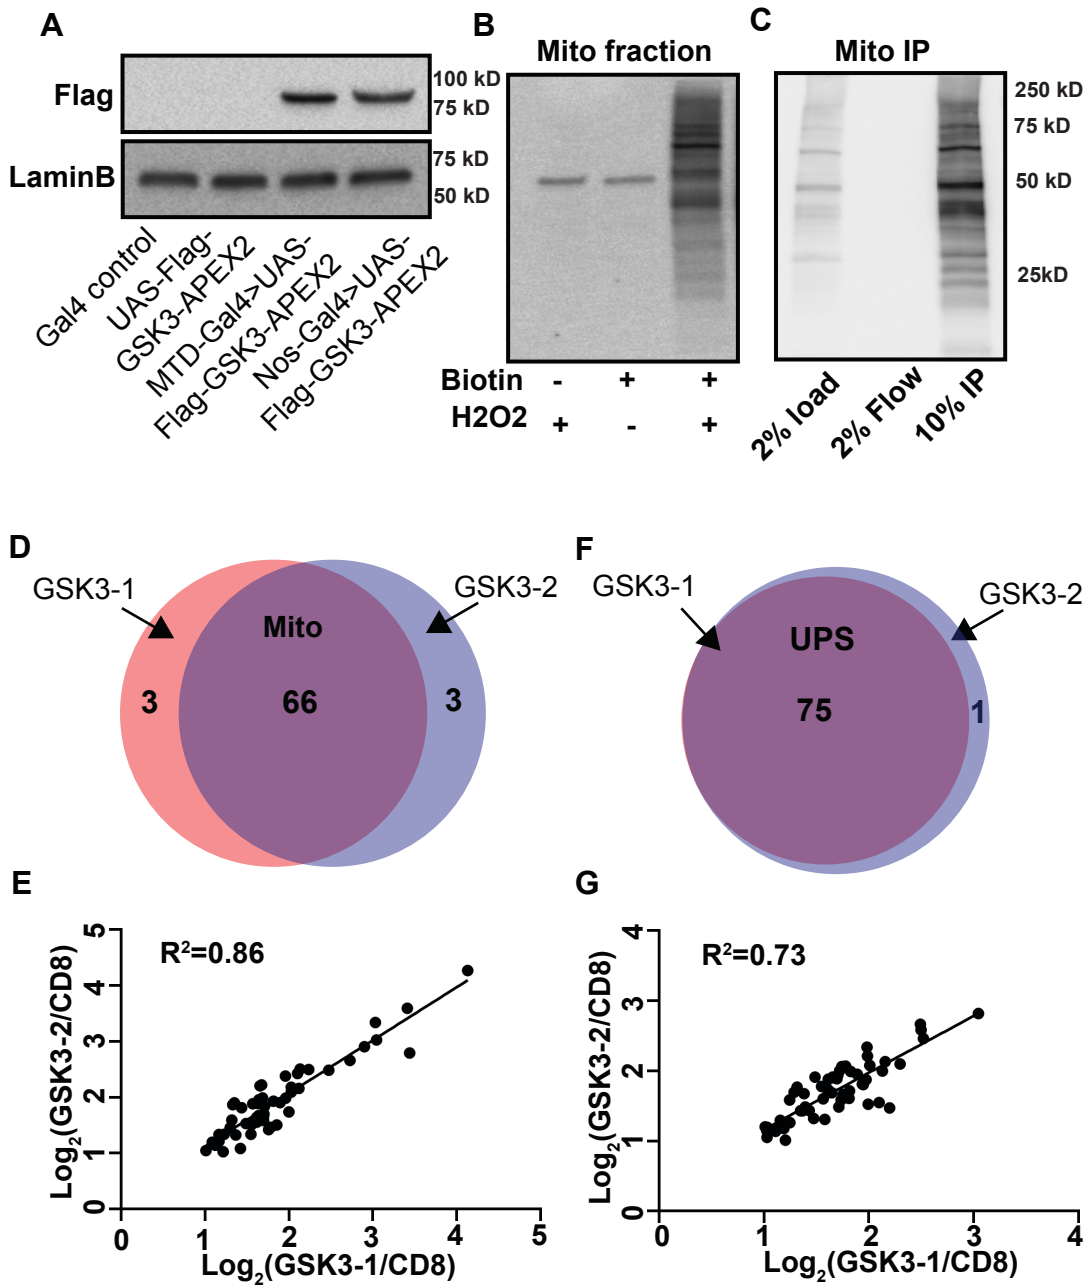

### **Supplementary Figure 3**

A-C: Validation of GSK3-APEX2 expression, biotinylation labeling specificity, and pulldown efficiency.

D and E: Overlap (D) and correlation analysis (E) for two biological replicates of mitochondria-associated proteins identified by GSK3-Apex2.

F and G: Overlap (F) and correlation analysis (G) for two biological replicates of UPS system proteins identified by GSK3-Apex2.

### Supplementary Figure 4

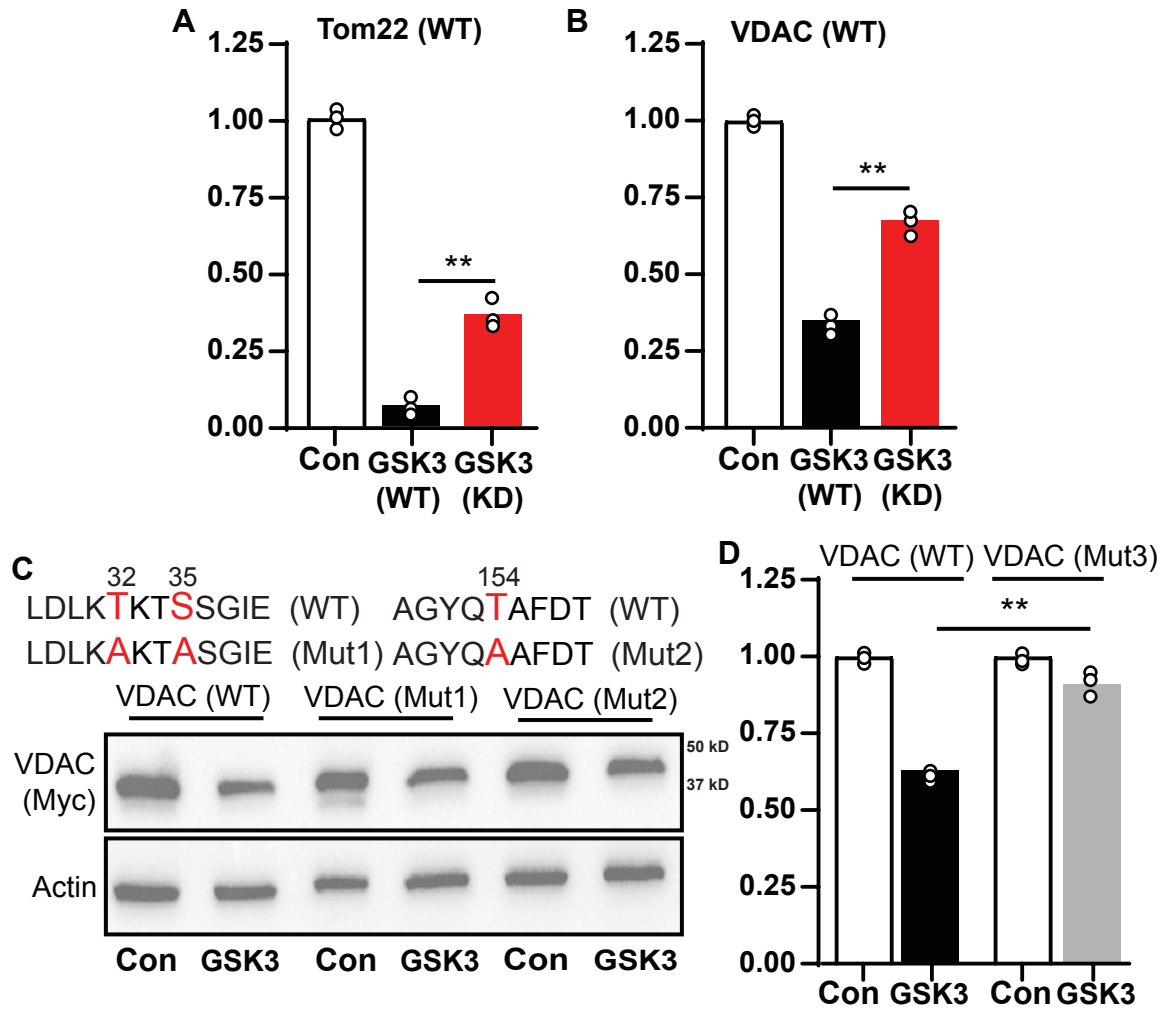

#### **Supplementary Figure 4**

A and B: Quantification of TOM22 (A) and VDAC (B) protein levels in control 293T cells or cells expressing wild-type GSK3 (WT) or kinase-dead GSK3 (KD). n=3 completely independent experiments.

C: Western blotting to detect wild-type VDAC (WT) and indicated phosphorylation site mutant VDACS (S/T->A) in control 293T cells and cells expressing wild-type GSK3 (WT) (n=3 independent experiments).

D: Quantification of wild-type VDAC (WT) and indicated phosphorylation site mutant VDAC (mut3) protein levels in control 293T cells and cells expressing wild-type GSK3 (WT). n=3 completely independent experiments. Significance values are calculated by a two-tailed student's t-test assuming unequal variance.

Supplementary Figure 5

A

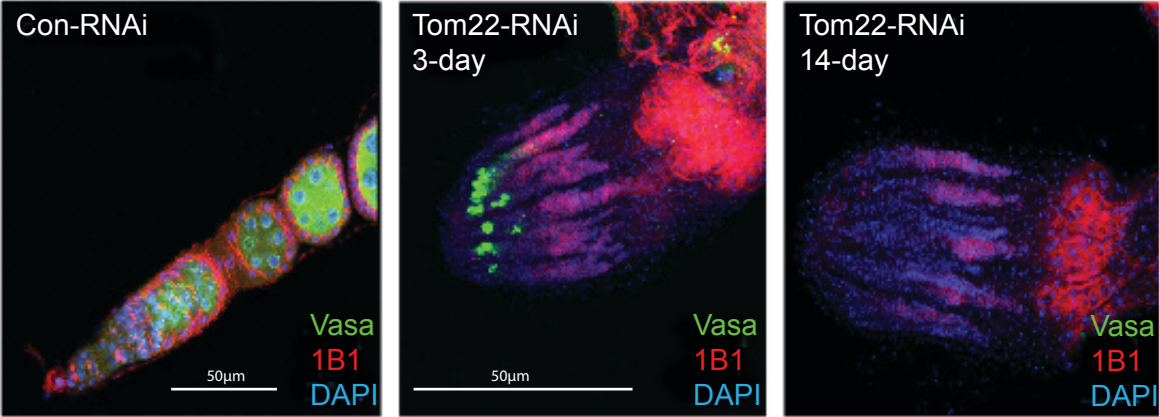

B

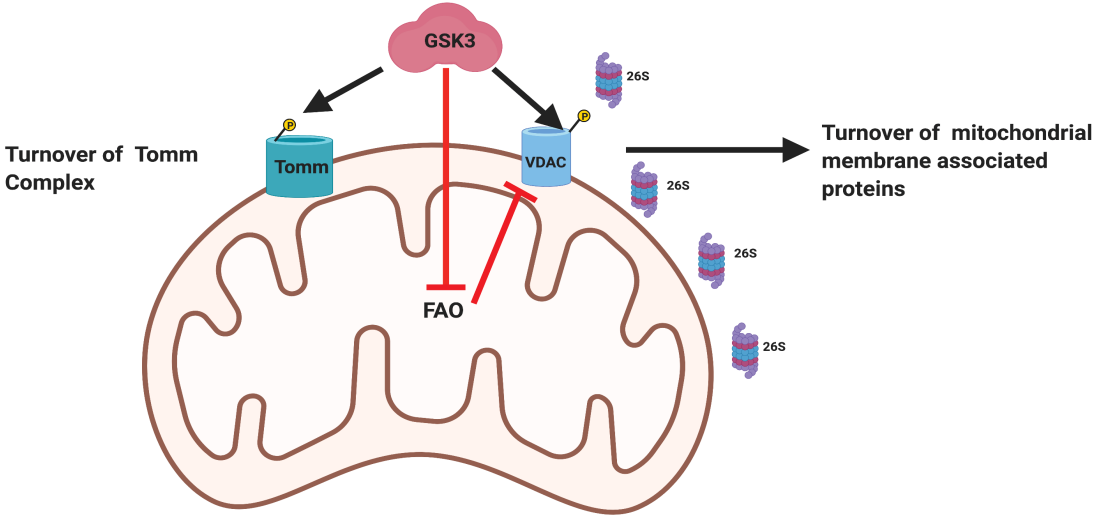

C

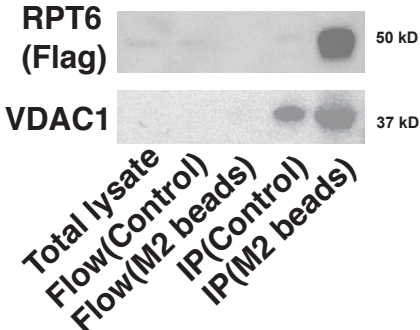

## Supplementary Figure 5

A: Immunostaining to detect VASA (green), *hts* (red), and DAPI (blue) in control-RNAi and Tom22-RNAi ovarioles at 3 and 14 days.

B: A model for GSK3 regulation of mitochondrial remodeling during quiescence. Created with BioRender.com

C: CO-IP assay using a RPT6-flag cell line to determine if VDAC1 associates with the proteasome in quiescent cells(n=3 independent experiments).

# Supplementary Figure 6

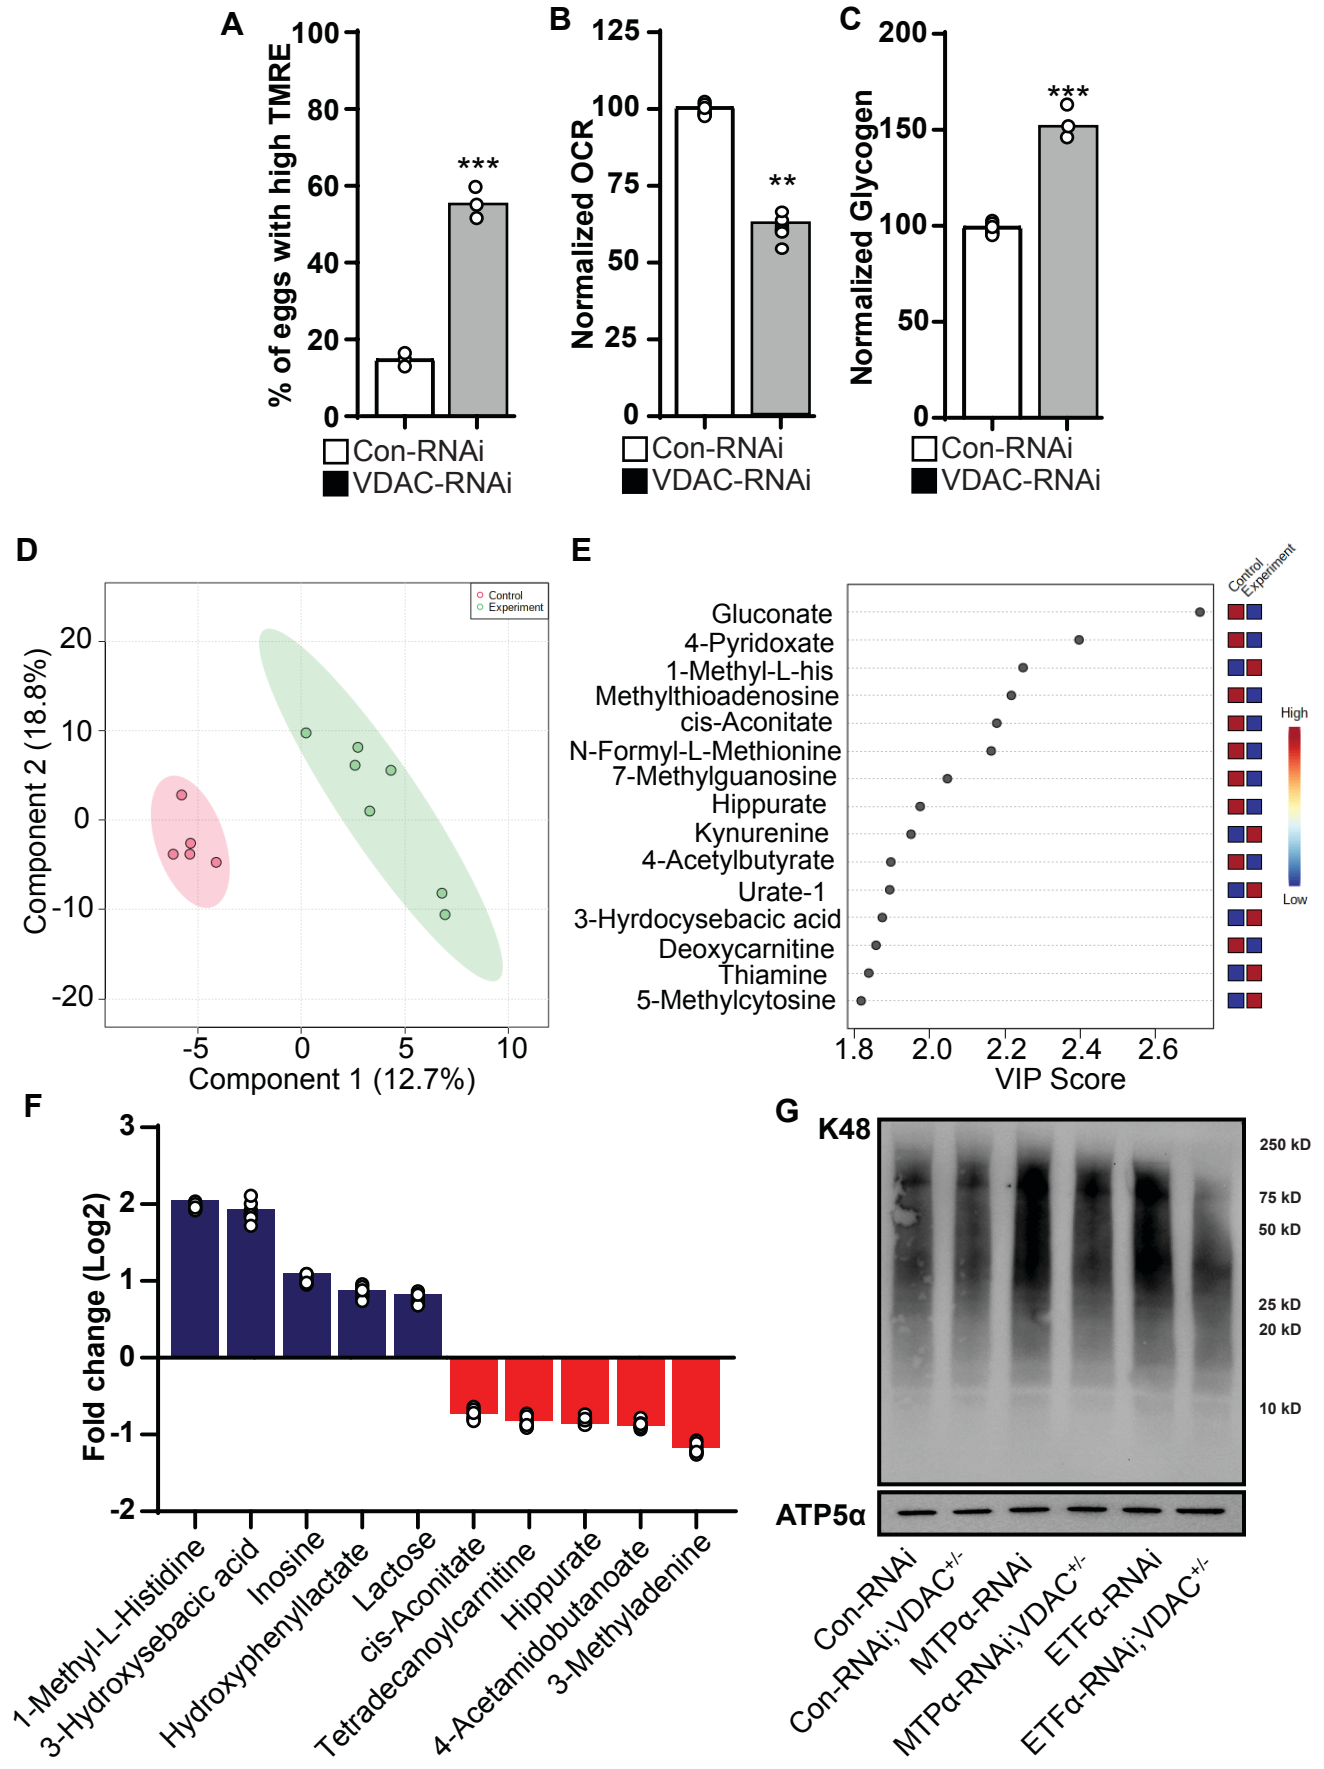

## Supplementary Figure 6

A and B: Effects of VDAC-RNAi on TMRE mitochondrial membrane potential staining ( 3 experiments of N=>40 egg chambers) (A) and OCR (N=4 experiments conducted on independent biological replicates) (B) in mitochondria from st10 eggs.

C: Normalized glycogen levels in st14 eggs from control-RNAi and VDAC-RNAi ovarioles n=3 independent experiments .

D-F: Summary of metabolic analysis of st14 eggs from control-RNAi and VDAC-RNAi ovarioles.

G: Measurements of K48 ubiquitin levels in epistasis analysis of VDAC and FAO pathway in regulating mitochondria-associated proteasome activity(n=3 independent experiments). Significance values are calculated by a two -tailed student's t-test assuming unequal variance.



# Supplementary Figure 7

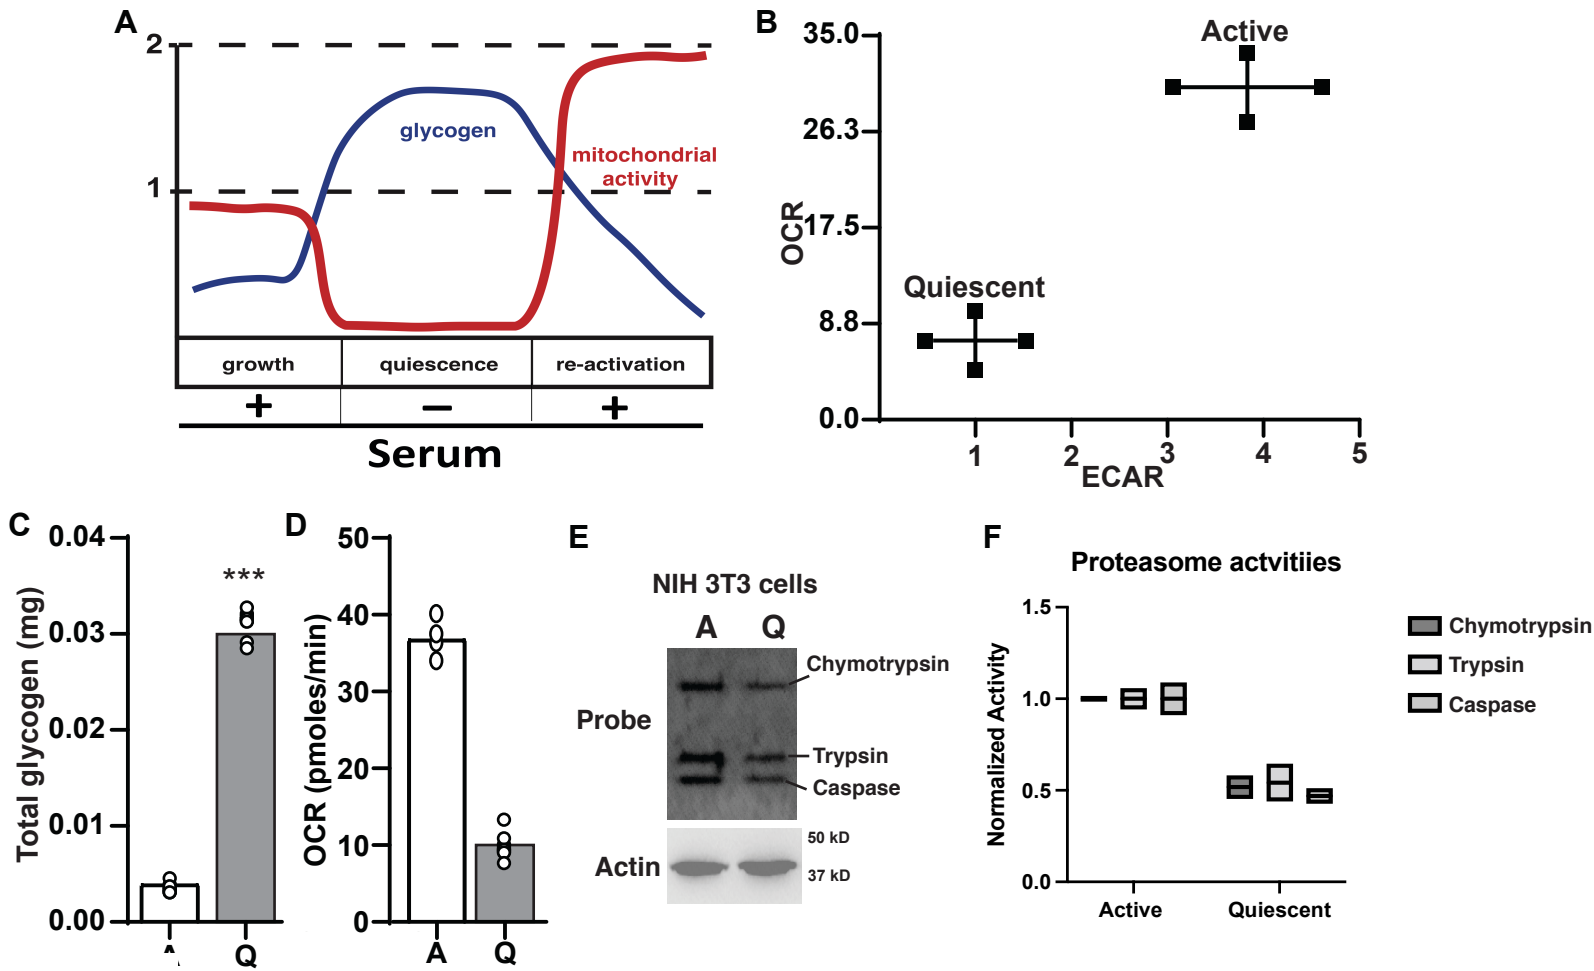

**G**

| Term                         | Count | Pvalue    | Fold enrichment | FDR       |
|------------------------------|-------|-----------|-----------------|-----------|
| Mitochondrion                | 93    | 7.00E-125 | 21.4            | 9.20E-123 |
| Transit peptide              | 57    | 5.40E-69  | 27.3            | 3.60E-67  |
| Acetylation                  | 75    | 4.10E-47  | 5.9             | 1.80E-45  |
| mitochondrial inner membrane | 42    | 1.30E-45  | 22.9            | 7.50E-44  |
| mitochondrial matrix         | 25    | 3.40E-28  | 28.1            | 1.30E-26  |
| Mitochondrion inner membrane | 26    | 5.60E-28  | 25              | 1.90E-26  |
| myelin sheath                | 24    | 2.30E-26  | 26.4            | 6.80E-25  |
| Metabolic pathways           | 43    | 5.40E-19  | 4.1             | 3.30E-17  |
| Carbon metabolism            | 19    | 6.00E-19  | 19.7            | 3.30E-17  |
| tricarboxylic acid cycle     | 12    | 1.00E-18  | 80.5            | 5.50E-16  |
| oxidation-reduction process  | 29    | 1.90E-18  | 8.3             | 5.50E-16  |
| Tricarboxylic acid cycle     | 11    | 2.30E-18  | 107.3           | 6.00E-17  |
| Oxidoreductase               | 25    | 5.10E-17  | 9.5             | 1.10E-15  |
| metabolic process            | 24    | 7.30E-17  | 10.1            | 1.40E-14  |
| mitochondrial outer membrane | 16    | 4.40E-16  | 22.1            | 1.00E-14  |
| FAD                          | 14    | 1.60E-15  | 28.9            | 3.00E-14  |
| Biosynthesis of antibiotics  | 20    | 2.60E-15  | 11.2            | 7.10E-14  |
| Phosphoprotein               | 69    | 2.70E-15  | 2.2             | 4.50E-14  |
| oxidoreductase activity      | 25    | 2.90E-15  | 7.9             | 7.00E-13  |
| Flavoprotein                 | 14    | 6.00E-15  | 26.3            | 8.80E-14  |

## **Supplementary Figure 7**

A: A model depicting the changes in mitochondrial activity and glycogen storage observed as cells transition from growth to quiescence and from quiescence to the reactivation of growth.

B: An energy map examining OCR and ECAR for actively growing and quiescent NIH 3T3 cells.

C and D: Glycogen (C) (n= 3 independent experiments) and OCR (D) measurements for actively growing and quiescent NIH 3T3 cells.

E: Assays using UbiQ-018 activity probe (which detects all three active sites of the proteasome) measuring proteasome activity in active and quiescent oocytes(n=2 independent experiments).

F: Quantification of the three activities of the proteasome (trypsin, chymotrypsin, and caspase) for active and quiescent oocytes(n=2 completely independent experiments on independent samples)..

G: GO term analysis of mitochondrial proteins identified in quiescent NIH 3T3 cells compared with active 3T3 cells. Significance values are calculated by a two -tailed student's t-test assuming unequal variance.
